# Supplementary material
Source: MDPI journal article supplement (https://www.mdpi.com/2075-163X/12/1/29)
Supplement: s1 [file s1]

## Supporting Information

### Insight into the crystal structures and physical properties of the uranium borides $\text{UB}_{1.78 \pm 0.02}$ , $\text{UB}_{3.61 \pm 0.041}$ and $\text{UB}_{11.19 \pm 0.13}$

Laura Martel <sup>1,\*</sup>, Thibault Charpentier <sup>2</sup>, Pedro Amador Cedran <sup>1</sup>, Chris Selfslag <sup>1</sup>, Mohamed Naji <sup>3</sup>, Jean-Christophe Griveau <sup>1</sup>, Eric Colineau <sup>1</sup> and Rachel Eloirdi <sup>1,\*</sup>

1 European Commission, Joint Research Centre (JRC), 76125 Karlsruhe Germany.

2 Université Paris-Saclay, CEA, CNRS, NIMBE, 91191 Gif-sur-Yvette cedex France.

3 LPAIS University of Sidi Mohamed Ben Abdellah 30000 Fez Morocco.

\* Correspondence: lpm.martel@gmail.com

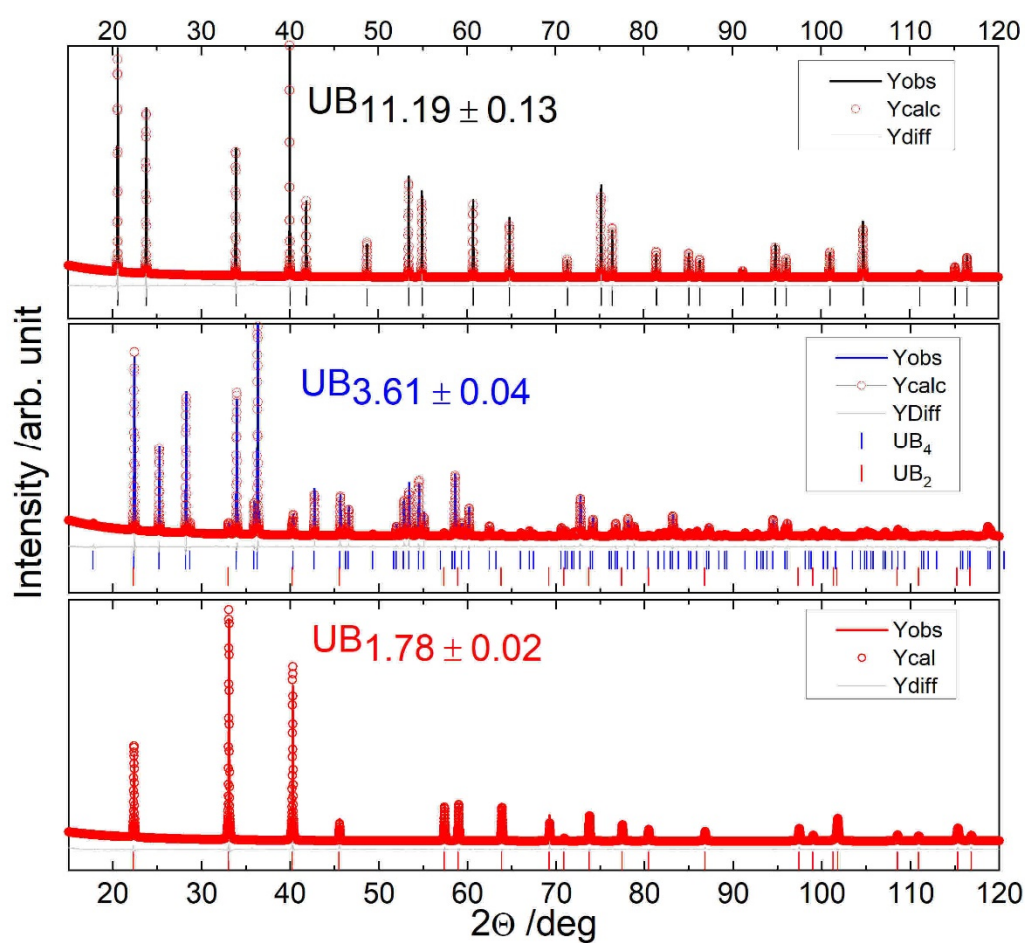

Figure S1. Full X-ray diffraction patterns and corresponding fits for the uranium borides.
